# Supplementary material for: Direct current electrical fields inhibit cancer cell motility in microchannel confinements
Source: Research Square preprint supplement (doi:10.21203/rs.3.rs-4829267/v1), 2024-09-03
Supplement: Supplementary file 1 [file bd9d3b1ca8beac79389cbede.docx]

Supplementary Video 1: Exemplary Movie of MDA-MB-231 cells migrating through 3 µm confinements over 24 h.

Supplementary Video 2: Exemplary Movie of MDA-MB-231 cells migrating through 11 µm confinements over 24 h.
